# Supplementary material for: Hyperthermia-induced protein corona improves the therapeutic effects of zinc ferrite spinel-graphene sheets against cancer
Source: Royal Society of Chemistry journal article supplement (doi:10.1039/c4ra10862k), 2014-11-11
Supplement: c4ra10862k1.pdf [file c4ra10862k1.pdf]

# **Hyperthermia-induced protein corona improves the therapeutic effects of zinc ferrite spinel-graphene sheets against cancer**

Mohammad Javad Hajipour,<sup>a,b</sup> Omid Akhavan,<sup>\*c</sup> Alireza Meidanchi,<sup>c,d</sup> Sophie Laurent,<sup>e</sup> and Morteza Mahmoudi<sup>\*b,f,g</sup>

<sup>a</sup>The Persian Gulf Marine Biotechnology Research Center, Bushehr University of Medical Sciences, Bushehr, Iran

<sup>b</sup>Department of Nanotechnology and Nanotechnology Research Center, Faculty of Pharmacy, Tehran University of Medical Sciences, Tehran, Iran,

<sup>c</sup>Department of Physics, Sharif University of Technology, P.O. Box 11155-9161, Tehran, Iran

<sup>d</sup>Department of Physics, Payame Noor University (PNU), P.O. Box 19395-3697, Tehran, Iran

<sup>e</sup>Department of General, Organic and Biomedical Chemistry, NMR and Molecular Imaging Laboratory, University of Mons, 19 Avenue Maistriau, B-7000 Mons, Belgium

<sup>f</sup>Department of Pediatrics, Division of Cardiology, Stanford University School of Medicine, Stanford, California, United States

<sup>g</sup>Division of Cardiovascular Medicine, Department of Medicine, Stanford University School of Medicine, Stanford, California, United States

Address correspondence to: (OK) email: [oakhavan@sharif.edu](mailto:oakhavan@sharif.edu); (MM) email: [mahmoudi@stanford.edu](mailto:mahmoudi@stanford.edu)

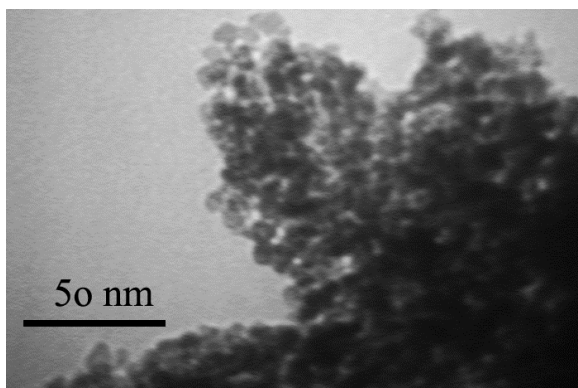

(a)

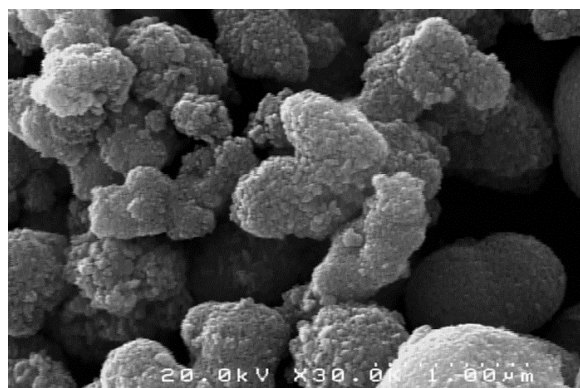

(b)

**Figure S1:** TEM (a) and SEM (b) images of pure  $ZnFe_2O_4$  nanoparticles.
